# Supplementary material
Source: PubMed Central journal article supplement (PMC5479132)
Supplement: NIHMS863821-supplement-3.pdf [file NIHMS863821-supplement-3.pdf]

## Supplemental Figure Legends

**Figure S1. Related to Figures 1 and 3:** Circadian study design for (A) in vivo mouse, and (B) Cell-autonomous U2 OS cell line (C) Cycling of the top 12 metabolites in mouse liver with JTK q-values  $< 4 \times 10^{-10}$ . The y-axis is the intensity following run-order correction as described in the methods. Data was derived from two biological replicates and two analytical replicates. Error bars represent standard error of the mean. D) Temporal acrophases of glycogen (from literature, see text), glucose, citrate, and malate. E) Juxtaposition of metabolites indicative of oxidative status and methylation. Numbers in red indicate acrophase in CT. Data for all time-series plots was derived from two biological replicates and two analytical replicates. Error bars represent standard error of the mean.

**Figure S2. Related to Figure 4:** Effect of oscillations following knockdown of circadian clock components in U2 OS cells. U2 OS cells were transfected with siRNAs and relative expression is normalized to GAPDH. (A) Relative expression of *BMAL1* (left panel), *CRY1* (middle panel), *CRY2* (right panel). (B) Distribution of periods with each metabolite plotted as points. Size indicates JTK BH.Q  $-\log$  value, and the line indicates density of periods. (C) *BMAL1* knockdown dampens oxidative cycling as measured by the NAD<sup>+</sup>/NADH raw ion count ratio (top panel) as compared to *CRY1* (middle) and *CRY2* (bottom). (D) Cycling of the top 13 metabolites under control conditions in the cell-autonomous model with JTK q-values  $< 0.05$ . The y-axis is the intensity following run-order correction as described in the methods. Data for all cycling plots was derived from two analytical replicates, and error bars represent standard error of the mean.

**Figure S3. Related to Figure 4:** Metabolic oscillations and pathway analysis under *CRY1* and *CRY2* knockdown conditions in U2OS cells. *CRY1* (left panel) and *CRY2* (right panel) knockdown increases the number of cycling metabolites, eliminates circadian oscillations. 69 metabolites (~50%) in *CRY1* knock down cells and 64 metabolites (47%) in *CRY2* knockdown cells show cycling.

**Figure S4. Related to Figure 5:** A) Differential analysis between U2 OS cells with *Cry1* KD (green bar) or scrambled control (blue bar). Samples were considered from all time points

to understand global Cry1 knockdown effect on metabolism. B) Frozen liver samples from mice of the indicated genotype (WT or CRY1<sup>-/-</sup>) and circadian timepoint (ZT 10 and ZT 22) were suspended in lysis buffer, lysed by Tissue Lyser II from Qiagen and further homogenized by passage through a Qias shredder column. Lysates were processed for expression by immunoblot for Cry1 and mTOR pathway proteins, with tubulin serving as a loading control.

**Figure S5. Related to Figure 7:** A) Cultured hepatocytes were synchronized with 0.1  $\mu$ M dexamethasone, and mRNA was collected at the indicated timepoints after synchronization. Expression of *Cry1* and *Cry2* were determined by qPCR, normalized to expression of 36B4 (*Rplp0*) as has been described (Gréchez-Cassiau, 2008) previously. Data are from two biological replicates (ie, *Cry1-1* is the first replicate, *Cry1-2* is the second replicate). (B) Heatmap of significantly cycling metabolite from primary hepatocyte metabolite profiling.

**Table S1. Related to Figures 1 and 3:** Compilation of characteristics of published circadian metabolomics studies.

**Table S2. Related to STAR methods:** Oligonucleotides used in this study.

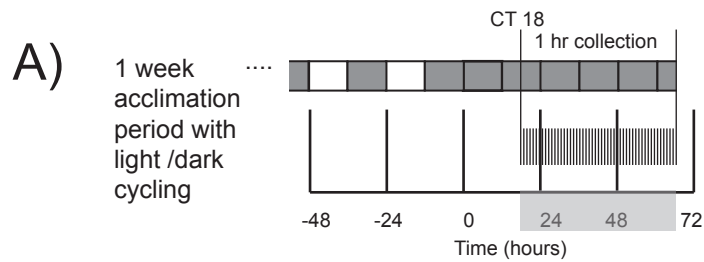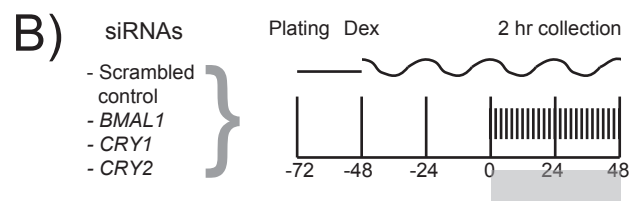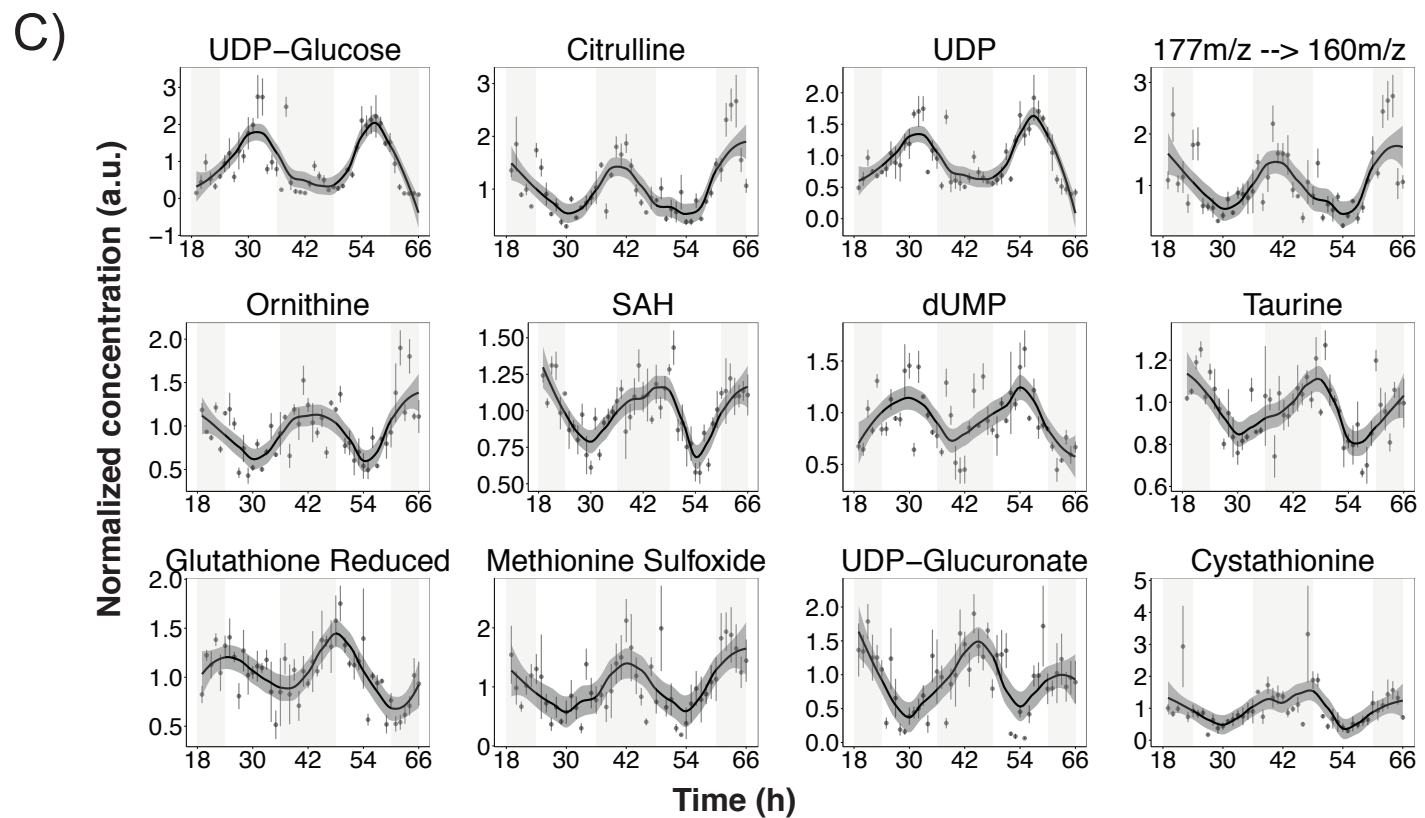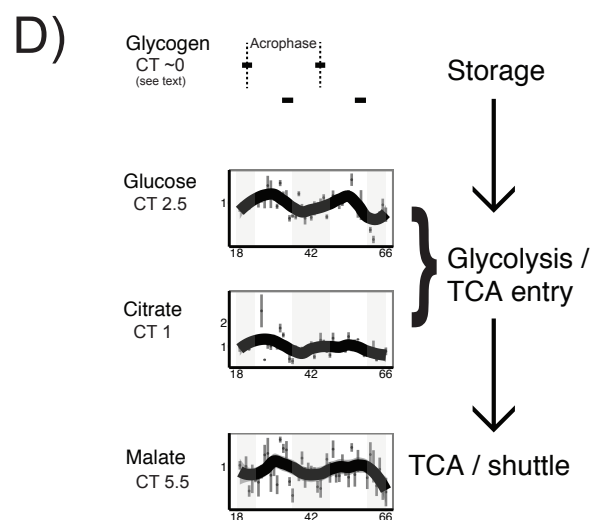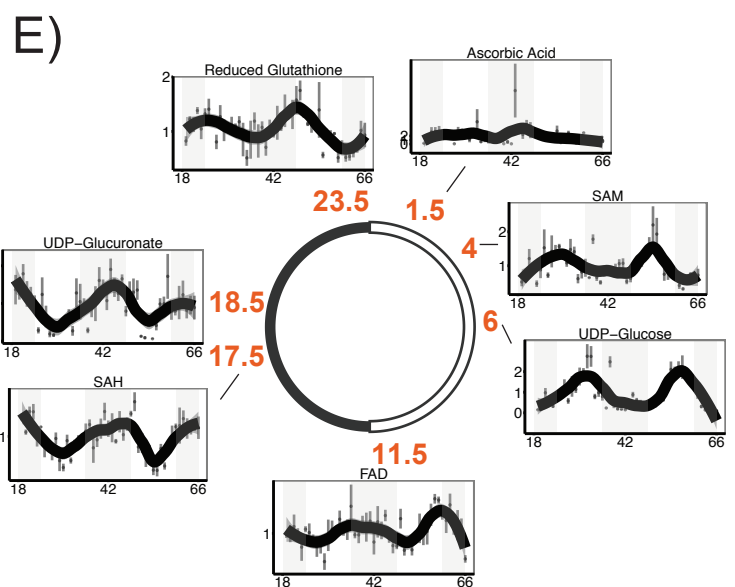

Figure S1

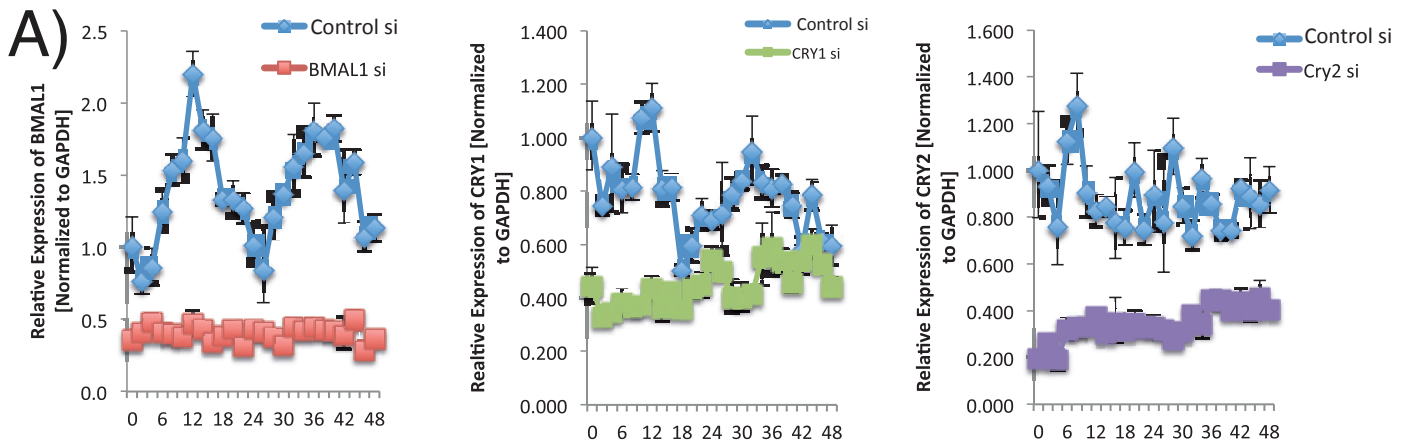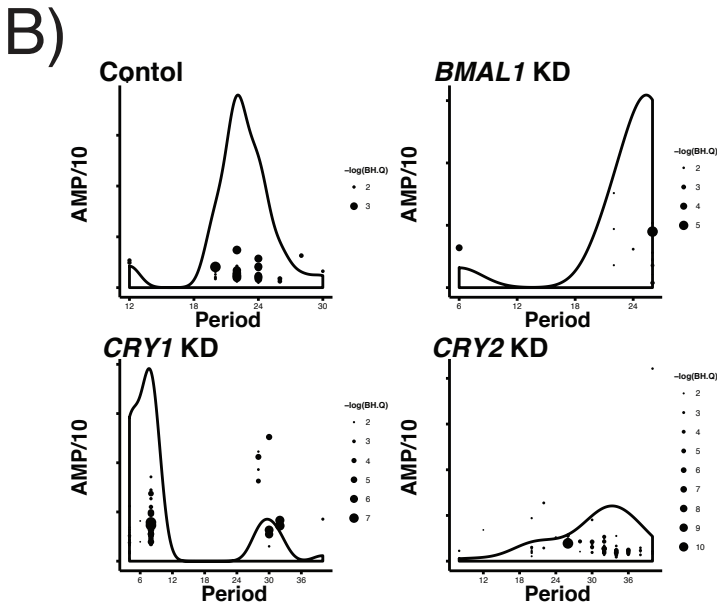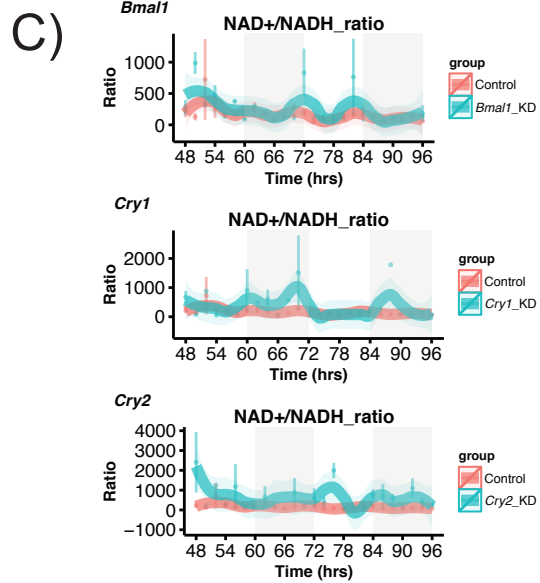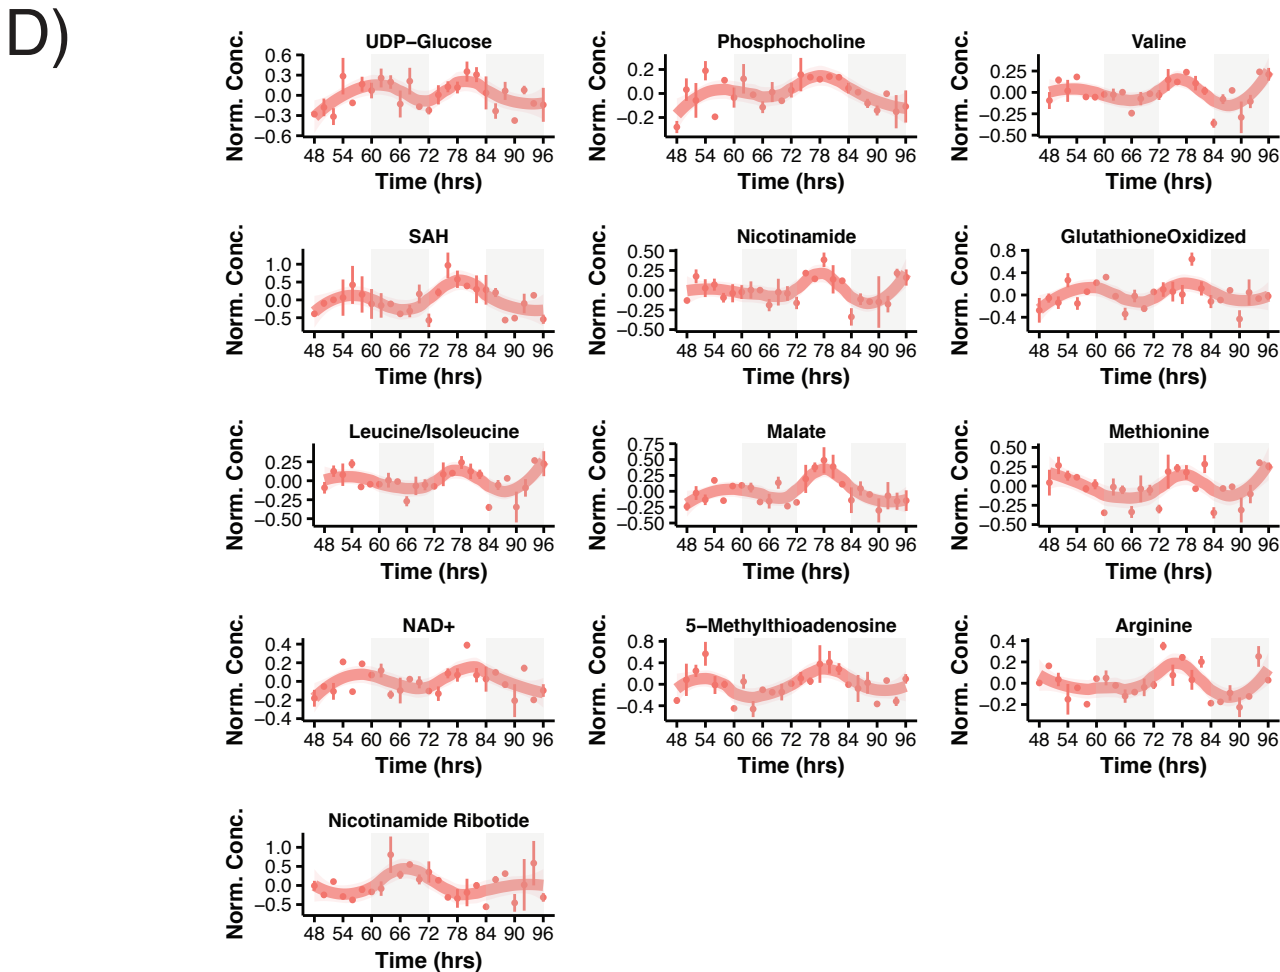

Figure S2

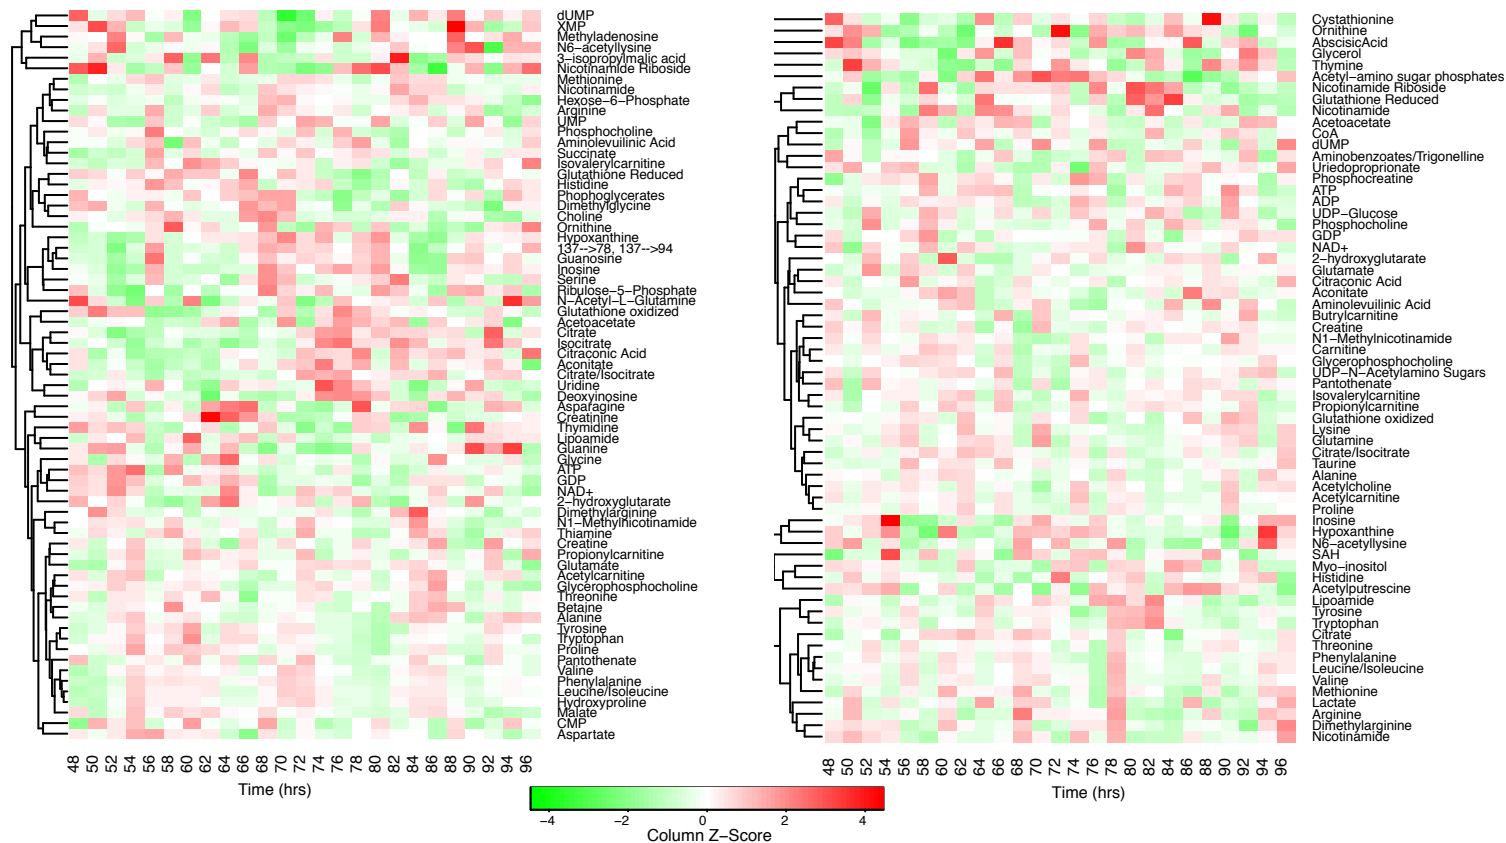

Figure S3



A)

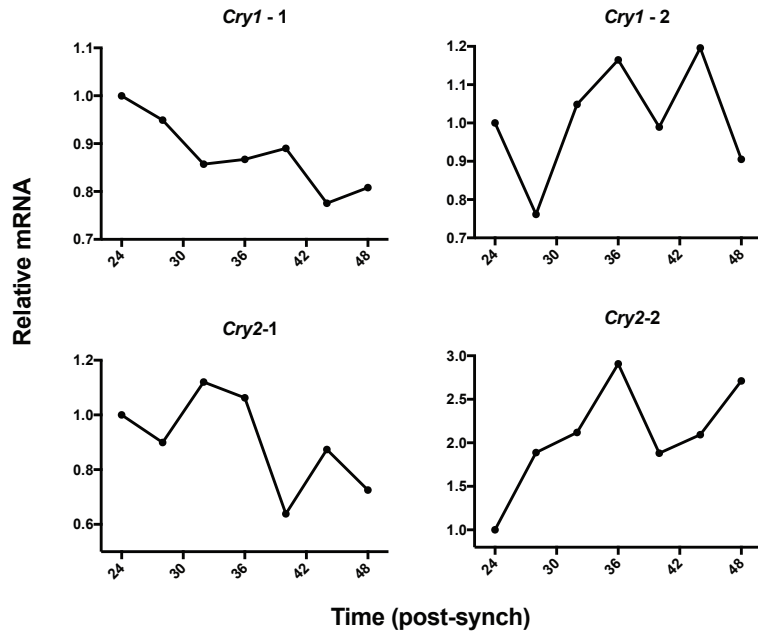

B)

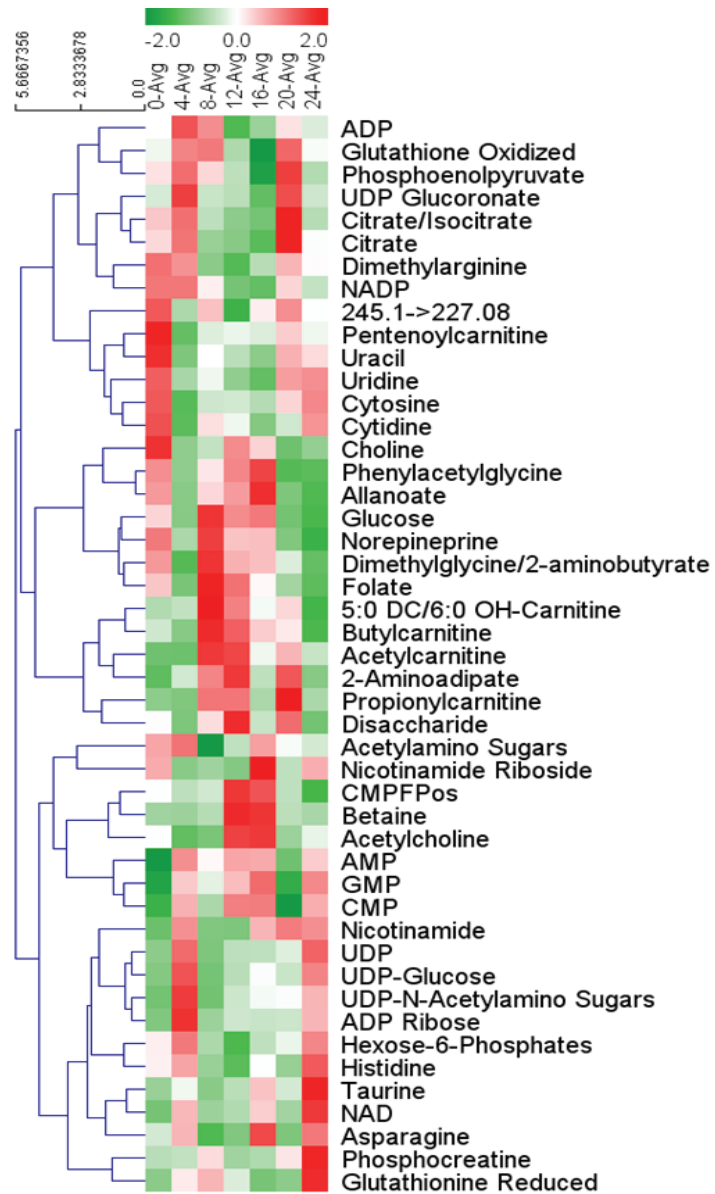

Figure S5

Table S1

|                                                    | Organism       | Circadian / Diurnal                                                  | Sample studied                  | Total Length | Resolution | Replicates? (Number) | Total samples | Metabolites measured                              |
|----------------------------------------------------|----------------|----------------------------------------------------------------------|---------------------------------|--------------|------------|----------------------|---------------|---------------------------------------------------|
| <b>Current study</b>                               | Mouse          | Dark / Dark                                                          | Liver                           | 48 h         | 1 h        | Y (2)                | 96            | 179                                               |
|                                                    | Human          | N/A                                                                  | U2 OS                           | 48 h         | 2 h        | N                    | 24            | 137                                               |
|                                                    |                |                                                                      | Primary Hepatocytes             | 24 h         | 4 h        | Y (2-3)              | 16            | 147                                               |
| <b>(Thaiss et al., 2016)</b>                       | Mouse          | Light / Dark                                                         | Feces<br>Serum                  | 48 h         | 6 h        | Y (18)               | 162           | ND                                                |
| <b>(Tran et al., 2016)</b>                         | Mouse          | Light / Dark                                                         | Liver<br>Serum                  | 24 h         | 6 h        |                      | 4             | 110<br>80                                         |
| <b>(Masri et al., 2016)</b>                        | Mouse          | Light / Dark                                                         | Liver                           | 24 h         | 4 h        | Y (5)                | 30            | ND                                                |
| <b>(Abbondante et al., 2015)</b>                   | Mouse          | Light / Dark                                                         | Liver<br>Serum                  | 24 h         | 4 h        | Y (5)                | 30            | 306<br>362                                        |
| <b>(Gogna et al., 2015)</b>                        | Fly            | Light / Dark & Temperature                                           | Whole body                      | 24 h         | 2 h        | Y (5)                | 12            | 14 metabolites / NMR                              |
| <b>(Li et al., 2015)</b>                           | Zebrafish      | Light / Dark                                                         | Whole larvae                    | 24 h         | 6 h        | Y (3)                | 12            | 73 assigned signals by NMR                        |
| <b>(Zwighaft et al., 2015)</b>                     | Mouse          | Light / Dark                                                         | Liver                           | 24 h         | 4 h        | Y (4)                | 24            | Polyamines / HPLC                                 |
| <b>(Giskeødegård et al., 2015)</b>                 | Human          | Dim light, constant routine, 24 hour wake/sleep, 24 hour wakefulness | Urine                           | 24 / 24      | 2-8 h      | Y (15)               | 105           | NMR / binning                                     |
| <b>(Castro et al., 2015; Paschos et al., 2012)</b> | Mouse          | Light / Dark                                                         | White and Brown Adipose Tissues | 24 h         | 6 h        | Y (3)                | 12            | - Fatty acids<br>- Intact lipids<br>- NMR polar   |
| <b>(Davies et al., 2014)</b>                       | Human          | Dim light, constant routine, 24 hour wake/sleep, 24 hour wakefulness | plasma                          | 24 / 24      | 2 h        | Y (12)               | 144 / 144     | 171                                               |
| <b>(Masri et al., 2014)</b>                        | Mouse          | Light / Dark                                                         | Liver                           | 24 h         | 4 h        | ND                   | ND            | ND                                                |
| <b>(Dyar et al., 2014)</b>                         | Mouse          | Light / Dark                                                         | Muscle                          | 24 h         | 4 h        | Y (5)                | 30            | 277 (only sugars reported)                        |
| <b>(Chaix et al., 2014)</b>                        | Mouse          | Light / Dark                                                         | Serum                           | 24 h         | 4 h        | N                    | 6             | 278                                               |
| <b>(Shostak et al., 2013)</b>                      | Mouse          | Light / Dark and Dark / Dark                                         | Blood / adipose                 | 24 h         | 6 h        | Y (3-5)              | 12-20         | Selected fatty acids / lipid compounds            |
| <b>(Eckel-Mahan et al., 2013)</b>                  | Mouse          | Light / Dark                                                         | Liver                           | 24 h         | 4 h        | Y (5)                | 30            | 306 total                                         |
| <b>(Chua et al., 2013)</b>                         | Human          | Dim light, Constant lab conditions, wakefulness                      | plasma                          | 28 h         | 4 h        | Y (20)               | 140           | LCMS / 263 lipids                                 |
| <b>(Hatori et al., 2012)</b>                       | Mouse          | Light / Dark                                                         | Liver                           | 24 h         | 3 h        | Y (3-4)              | 24-32         | 324                                               |
| <b>(Eckel-Mahan et al., 2012)</b>                  | Mouse          | Light / Dark                                                         | Liver                           | 24 h         | 6 h        | Y (5)                | 20            | 309 named (Metabolon)                             |
| <b>(Dallmann et al., 2012)</b>                     | Human (pooled) | Dim light / constant protocol / sleep deprivation                    | Blood plasma                    | 40 h         | 4 h        | Y (10)               | 100           | 258 total, 219 across two individuals (Metabolon) |
| <b>(Fustin et al., 2012)</b>                       | Mouse          | Light / Dark and Dark / Dark                                         | Liver                           | 24 h         | 4 h        | Y (3)                | 18            | CE-TOF-MS; only nucleic acid metabolites reported |



**Table S2**

| REAGENT or RESOURCE                              | SOURCE                       | IDENTIFIER                                                       |
|--------------------------------------------------|------------------------------|------------------------------------------------------------------|
| <b>36B4 (<i>Rplp0</i>)</b>                       | IDT                          | TTA TAA CCC TGA AGT GCT<br>CGA C, CGC TTG TAC CCA<br>TTG ATG ATG |
| <b>REV-ERB<math>\alpha</math> (<i>Nr1d1</i>)</b> | Taqman Gene Expression Assay | Mm00520708_m1                                                    |
| <b>REV-ERB<math>\beta</math> (<i>Nr1d2</i>)</b>  | IDT                          | Mm.PT.51.12747673                                                |
| <b>BMAL1 (<i>Arntl</i>)</b>                      | Taqman Gene Expression Assay | Mm00500226_m1                                                    |
| <b><i>Cry1</i></b>                               | Taqman Gene Expression Assay | Mm00514392_m1                                                    |
| <b><i>Cry2</i></b>                               | Taqman Gene Expression Assay | Mm01331543_g1                                                    |
| <b><i>GAPDH</i></b>                              | Taqman Gene Expression Assay | Endogenous Human control                                         |
| <b><i>ARNTL</i></b>                              | Taqman Gene Expression Assay | Hs00154147_m1                                                    |
| <b><i>CRY1</i></b>                               | Taqman Gene Expression Assay | Hs00172734_m1                                                    |
| <b><i>CRY2</i></b>                               | Taqman Gene Expression Assay | Hs00391360_m1                                                    |
| <b>siRNA targeting human <i>CRY1</i></b>         | Qiagen                       | GS1407                                                           |
| <b>siRNA targeting human <i>CRY2</i></b>         | Qiagen                       | GS1408                                                           |
| <b>siRNA targeting human <i>ARNTL</i></b>        | Qiagen                       | GS406                                                            |
| <b>AllStars Negative Control siRNA</b>           | Qiagen                       | SI03650318                                                       |
